# Supplementary material for: White light emitting diode induces autophagy in hippocampal neuron cells through GSK-3-mediated GR and RORα pathways
Source: Aging (Albany NY). 2019 Mar 28;11(6):1832–49. doi: 10.18632/aging.101878 (PMC6461168; doi:10.18632/aging.101878)
Supplement: Supplementary Figures [file aging-11-101878-s001.pdf]

## SUPPLEMENTARY MATERIALS

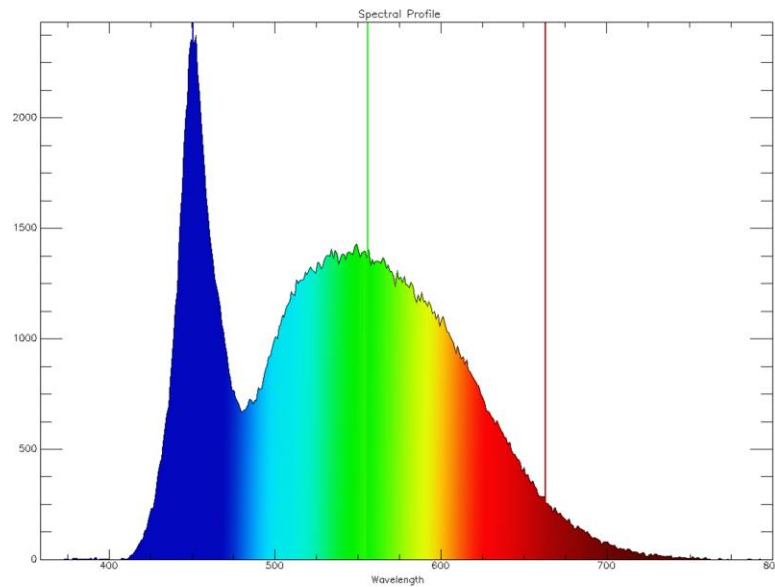

Supplementary Figure 1. Light spectrum of multichromatic white LED light.

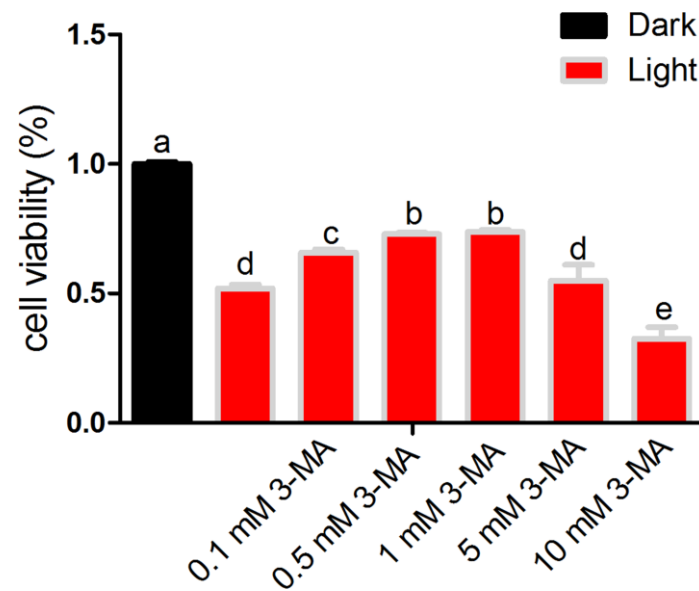

Supplementary Figure 2. Cell viability in LED light exposed HT-22 cells treated with different concentrations of autophagy inhibitor, 3-MA. At low concentrations up to 1 mM, 3-MA was able to partially rescue the light-induced decrease in cell viability, yet at high concentrations, 5 mM and 10 mM, 3-MA failed to rescue or even further reduced the cell viability. Values are means  $\pm$  SEM. Bars with different superscripts are significantly different from each other ( $p < 0.05$ ,  $n = 10$ ).

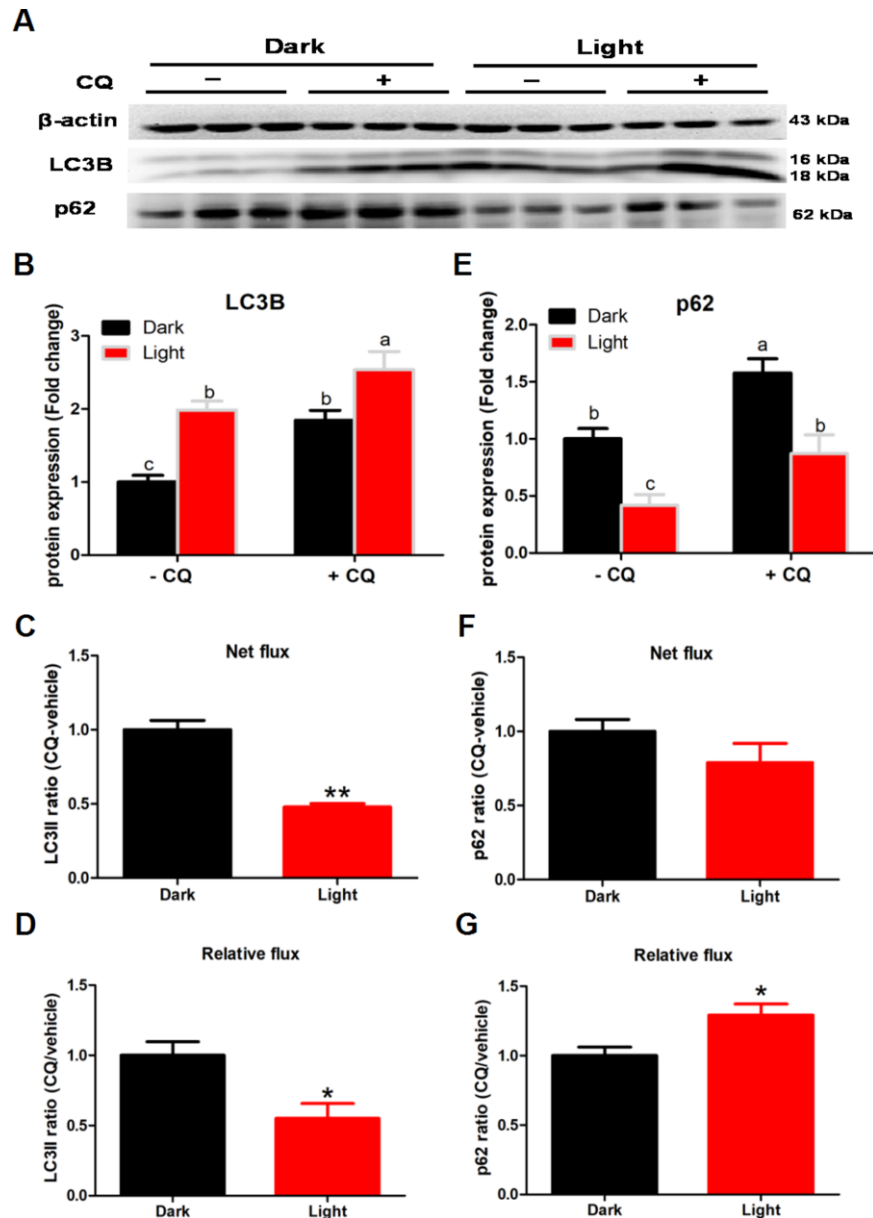

**Supplementary Figure 3. White LED light exposure influence autophagy flux in hippocampal neuron cells.** To detect the effect of white LED light on autophagy flux, we added 50  $\mu$ M CQ with 2h after white LED light exposure. (A) Images of bands detected in Western blot analyses; (B) LC3B protein levels in Dark and Light group with or without CQ. Values are means  $\pm$  SEM. Bars with different superscripts are significantly different from each other ( $p < 0.05$ ,  $n = 3$ ); (C) Net flux of LC3II protein. Values are means  $\pm$  SEM, \*\*  $p < 0.01$  compared with Dark group,  $n = 3$ ; (D) Relative flux of LC3II protein. Values are means  $\pm$  SEM, \*  $p < 0.05$  compared with Dark group,  $n = 3$ ; (E) p62 protein levels in Dark and Light group with or without CQ. Values are means  $\pm$  SEM. Bars with different superscripts are significantly different from each other ( $p < 0.05$ ,  $n = 3$ ); (F) Net flux of p62 protein. Values are means  $\pm$  SEM,  $n = 3$ ; (G) Relative flux of p62 protein. Values are means  $\pm$  SEM, \*  $p < 0.05$  compared with Dark group,  $n = 3$ .
